1 Short Communication

2 **The MAGOH paralogs - MAGOH, MAGOHB and their multiple isoforms**

3 Ayushi Rehman<sup>1</sup>, Pratap Chandra<sup>1</sup> and Kusum Kumari Singh\*<sup>1</sup>

4 <sup>1</sup> Department of Biosciences and Bioengineering, Indian Institute of Technology Guwahati,  
5 Guwahati-781039, Assam, India; ayushirehman@iitg.ac.in (A.R.); singhpc90@iitg.ac.in (P.C.)  
6 kusumsingh@iitg.ac.in (K.K.S.)

7 \* Correspondence: kusumsingh@iitg.ac.in; Tel.: +91-(0)-361-2583206; Fax: +91-(0)-361-2582249

8

9

10

11

12

13

14

15

16

17

18

19

20

21

22

23

24 **ABSTRACT**

25 A central processing event in eukaryotic gene expression is splicing. Concurrent with splicing, the  
26 core-EJC proteins, eIF4A3 and RBM8A-MAGOH heterodimer are deposited 24 bases upstream of  
27 newly formed exon-exon junctions. One of the core-EJC proteins, MAGOH contains a paralog  
28 MAGOHB, and this paralog pair is conserved across vertebrates. Upon analysis of the splice variants  
29 of MAGOH-paralogs, we have found the presence of alternate protein isoforms which are also  
30 evolutionarily conserved. Further, comparison of the amino acid sequence of the principal and  
31 alternate protein isoforms has revealed absence of key amino acid residues in the alternate isoforms.  
32 The conservation of principal and alternate isoforms correlates to the importance of MAGOH and  
33 MAGOHB across vertebrates.

34 Keywords: MAGOH, MAGOHB, EJC, isoforms

35 Abbreviations: EJC – Exon Junction Complex, MAGOH-mago nashi homolog, eIF4A3 – eukaryotic  
36 initiation factor 4 A3, RBM8A- RNA binding motif 8A (also known as Y-14)

37

38

39

40

41

42

43

44

45

46

47

48

49

50

51

52

53           **1. INTRODUCTION**

54       The primary step in eukaryotic gene expression involves transcription of DNA into precursor-mRNAs  
55       (pre-mRNAs). The pre-mRNAs undergo various post-transcriptional processing events before  
56       generating functional protein products. A notable processing event is splicing, where the spliceosome  
57       removes introns and ligates exons together. Concurrent with splicing, mature mRNAs are marked  
58       with the exon junction complex (EJC) at 24 nucleotides upstream of an exon-exon junction<sup>1</sup>. The EJC  
59       forms a gene regulatory nexus composed of many proteins that are grouped under stable core- and  
60       transient peripheral-protein complexes. The core-EJC consists of three proteins, eIF4A3 and RBM8A-  
61       MAGOH heterodimer; whereas the peripheral-EJC includes ALYREF, ASAP complex or PSAP  
62       complex, and Upf proteins<sup>2-6</sup>. Additional to mRNA processing, the core-EJC proteins have essential  
63       functions in brain development and embryonic neurogenesis<sup>7</sup>. In this communication, we will mainly  
64       focus on one of the core-EJC proteins, MAGOH.

65       MAGOH (*mago nashi* homolog) was originally identified in *Drosophila melanogaster*, where  
66       embryos lacking functional mago protein produced sterile progeny. Thus, this protein was named  
67       “mago nashi” meaning “without grandchildren” in the Japanese language<sup>8</sup>. MAGOH is well  
68       conserved among all vertebrates. It functions to maintain integrity of mRNAs as a part of the EJC as  
69       well as the nonsense-mediated mRNA decay (NMD) pathway<sup>9</sup>. The importance of MAGOH in NMD  
70       has recently also been characterised in zebrafish<sup>10</sup>. Interestingly, vertebrates contain a paralog of  
71       MAGOH, MAGOHB which is also associated with mRNAs via EJC and NMD<sup>11</sup>. In addition to their  
72       roles in mRNA processing, the MAGOH paralogs (MAGOH and MAGOHB) have been found to be  
73       associated with cancer progression. In cancers with a hemizygous deletion of MAGOH, MAGOHB  
74       was suggested as the highest dependent gene. The dependency of MAGOHB in such MAGOH  
75       deficient cancers have the potential for cancer treatment<sup>12</sup>. MAGOH paralogs have also been found to  
76       be involved in gastric cancers. Importantly, the simultaneous knockdown of MAGOH-MAGOHB in  
77       gastric cancer cells exhibited anti-tumor effects via the BRAF/MEK/ERK signalling pathway<sup>13</sup>. Thus,  
78       the MAGOH paralogs are essential for proper functioning of cells, yet sufficient information on the  
79       architecture and evolutionary conservation of these genes is lacking. Concordant with most

80 eukaryotic genes, both the MAGOH-paralogs undergo alternative splicing and produce multiple splice  
81 variants, which have not yet been characterised. In this communication, we will discuss the features of  
82 the alternate protein isoforms of MAGOH-paralogs in humans and mice. We will also look at  
83 structural features of the alternate isoforms compared to the principal MAGOH protein isoform.

## 84 **2. RESULTS and DISCUSSION**

### 85 **2.1 MAGOH paralogs have multiple protein isoforms in humans**

86 MAGOH-paralogs belong to the MAGO NASHI protein family, Ensembl ID-PTHR12638. In  
87 humans, *MAGOH* also known as *MAGOHI* or *MAGOHA* is located on the reverse strand of  
88 chromosome 1 at 1p32.3 (*chr1:53,226,900-53,238,518, GRCh38/hg38*). Alternative splicing of  
89 *MAGOH* pre-mRNA generates four transcripts, *MAGOH-201*, *MAGOH-202*, *MAGOH-203*, and  
90 *MAGOH-204* (Table-1). *MAGOH-202* is the primary transcript made of five exons and encodes the  
91 principal protein isoform of 146 amino acids (aa). *MAGOH-201* constitutes four exons and codes for  
92 an alternate protein isoform of 109 aa. Comparison of *MAGOH-201* with *MAGOH-202* reveals  
93 skipping of exon 3 (111 nucleotides) in *MAGOH-201*, generating the alternate isoform (Figure-1a).  
94 The other transcripts, *MAGOH-203* and *MAGOH-204* comprise three exons and do not translate into  
95 proteins due to the absence of open reading frames (ORF). Hence, *MAGOH* is transcribed to generate  
96 four splice variants, of which two are protein-coding and two are non-coding. The finding of an  
97 alternate isoform (109 aa) is interesting as *MAGOH* is primarily mentioned as a 146 aa protein, with a  
98 molecular weight of 17 kDa<sup>14,15</sup>. Subsequent to the finding of an alternate transcript in *MAGOH*, we  
99 were interested to find out if its paralog, *MAGOHB* also produces an alternate transcript.

100 The *MAGOHB* gene in humans is located on the reverse strand of chromosome 12 at 12p13.2  
101 (*chr12:10,604,193-10,613,609, GRCh38/hg38*). As per the Ensembl genome browser, *MAGOHB* pre-  
102 mRNA generates eleven alternately spliced transcripts (Table-1). Of these eleven transcripts, three  
103 have coding potential. Thus, similar to *MAGOH*, *MAGOHB* also produces multiple protein coding  
104 transcripts. Two of the protein-coding transcripts, *MAGOHB-201* and *MAGOHB-204*, contain five  
105 exons. *MAGOHB-201* is the primary transcript and codes for the 148 aa primary protein isoform,  
106 while the alternate transcript, *MAGOHB-204* codes for the alternate 102 aa protein isoform. The two

107 transcripts differ due to the presence of an alternative 5' splice site in the first exon of *MAGOHB-204*  
108 (Figure-1a). The third protein-coding transcript, *MAGOHB-211* consists of 2 exons which code for an  
109 81 aa protein. In the transcript, *MAGOHB-211*, its first exon is similar to the principal isoform,  
110 *MAGOHB-201*, whereas its second exon differs completely due to the presence of an alternate 3'  
111 splice site. *MAGOHB* thus produces three different protein isoforms. It will be fascinating to analyse  
112 whether the alternate protein isoforms are also generated in other species. Apart from these three  
113 protein coding transcripts, five other transcripts (*MAGOHB-205*, *-206*, *-208*, *-209*, *-210*) are also  
114 generated. Out of these five, three transcripts *MAGOHB-208*, *MAGOHB-209* and *MAGOHB-205* are  
115 made of six exons whereas *MAGOHB-206* and *MAGOHB-210* are composed of five exons. All the  
116 five transcripts are degraded via the NMD pathway due to the presence of premature termination  
117 codons (PTCs), which is one of the prerequisites of NMD. Lastly, the remaining three transcripts of  
118 *MAGOHB*, *MAGOHB-202*, *-203*, *-207* have intron retention (IR), and do not code for any protein.  
119 Here, *MAGOHB-203* and *MAGOHB-207* comprise of three exons whereas *MAGOHB-202* is made of  
120 two exons. In this article, we will focus only on the protein coding transcripts of both the *MAGOHB*-  
121 paralogs.

122 In line with the Ensembl annotation, we will be referring to the protein isoforms according to their  
123 transcript IDs. We observed that the two *MAGOHB* protein isoforms, principal isoform-146 aa and  
124 alternate isoform-109 aa differ in 37 residues, i.e., amino acids 50-86 of the principal isoform. In case  
125 of *MAGOHB*, three protein isoforms are generated. Coding region of the transcript *MAGOHB-204*  
126 starts from the second exon, and translates into an alternate protein isoform that varies from the  
127 principal protein isoform, *MAGOHB-201* in the N-terminus (devoid of residues 1-46). The third  
128 protein isoform, *MAGOHB-211* differs from the principal isoform in amino acids 38-81 since its  
129 second exon is formed by an alternate 3' splice site. The presence of two functionally redundant  
130 *MAGOHB* paralogs is in itself fascinating. From this characterisation we also know that both the  
131 *MAGOHB* paralogs generate multiple protein isoforms in humans. In the following sections we have  
132 analysed the presence of multiple protein isoforms of *MAGOHB* paralogs across different species,

133 which might hint on an evolutionarily conserved function of the alternate protein isoforms generated  
134 by the MAGOH paralogs.

## 135 **2.2 MAGOHB codes for multiple protein isoforms in mice**

136 The MAGOH paralogs are conserved across vertebrates and MAGOH has been widely studied in  
137 mice. The presence of multiple protein isoforms of the MAGOH paralogs in humans raised the next  
138 question – are such alternate protein isoforms also present in mice? Hence, we analysed the mouse  
139 genome on Ensembl for multiple isoforms of MAGOH paralogs (Table-2). Here, we have referred to  
140 the mouse orthologs of human *MAGOH* paralogs as *Magoh* and *Magohb*. In mice, *Magoh* is located  
141 on chromosome 4 (*chr 4:107,879,755-107,887,424, GRCm38*), and is transcribed into two transcripts,  
142 *Magoh-201* and *Magoh-202*. *Magoh-201* is translated into a 146 aa protein, whereas *Magoh-202* does  
143 not code for any protein because of the absence of an ORF. Therefore, unlike humans, mice do not  
144 produce any alternate protein isoform of *Magoh*. The paralog of *Magoh*, *Magohb* is located on the  
145 reverse strand of chromosome 6 (*chr 6:131,284,388-131,293,244, GRCm38*). A total of seven  
146 *Magohb* transcripts are generated in mice, where two transcripts (*Magohb-201* and *Magohb-205*) are  
147 protein-coding. *Magohb-201* translates into the 148 aa principal protein isoform, whereas *Magohb-*  
148 *205* codes for the alternate protein isoform of 102 aa. Thus, in humans and mice two protein isoforms  
149 of MAGOHB are generated, which are of the same length. Similar to the alternate human MAGOHB  
150 transcript, *MAGOHB-204*, the first exon of *Magohb-205* constitutes most of the 5'UTR region and  
151 ligates exon 2 via an alternate 5' splice site (Figure-1b). The start codon for *Magohb-205* is present in  
152 the second exon, thus the protein it encodes is devoid of residues 1 – 46 compared to the principal  
153 isoform. Curiously, splicing patterns of the two *Magohb* protein isoforms in mice are very similar to  
154 human MAGOHB protein isoforms. Besides the protein-coding transcripts, three transcripts, *Magohb-*  
155 *202*, *-203*, *-204*, are subjected to degradation via NMD. The remaining two transcripts (*Magohb-206*  
156 and *Magohb-207*) retain intronic regions and do not code for any protein. Thus, similar to its human  
157 ortholog, *Magohb* in mice also generates multiple protein-coding and non-coding splice variants.

158 Altogether, we find *MAGOH* transcript variants in humans and mice belong to two biotypes- protein  
159 coding transcripts and transcripts without an ORF; while *MAGOHB* transcript variants belong to three

160 biotypes – protein-coding, NMD-sensitive, and IR. In both the species, *MAGOH* and *MAGOHB*  
161 generate multiple splice variants. The pattern of splicing for *MAGOH*-paralogs is similar, as both the  
162 species produce protein-coding as well as non-coding transcripts. In general, multiple splice variants  
163 tend to increase the proteome diversity of the genome. Among various alternative splicing (AS)  
164 events, IR, and AS-NMD are important for post-transcriptional gene regulation<sup>16,17</sup>. It is also likely  
165 that transcripts with similar exon-intron structure, referred to as iso-orthologs, have similar biological  
166 function<sup>18</sup>. The similarity in splicing pattern as well as length of the alternate protein-coding  
167 transcripts prompted us to shift our focus to the sequence conservation of the alternate protein  
168 isoforms, discussed in the next section. The reason behind generation of multiple protein-coding and  
169 non-coding splice variants of *MAGOH*-paralogs is not yet known. They may contribute either  
170 towards regulation of *MAGOH*-paralogs or may perform some unexplored function.

### 171 **2.3 Alternate isoforms of *MAGOH* paralogs are conserved across different species**

172 We have described that *MAGOH*-paralogs produce more than one protein isoform (Figure-1). In this  
173 section, we depict the conserved nature of the alternate protein isoforms. To gain further insight into  
174 the conservation of the alternate proteins of *MAGOH* paralogs, we performed pairwise alignments of  
175 the protein sequences in humans and mice. We first compared the principal isoforms of *MAGOH*-  
176 paralogs, *MAGOH*-202 with *Magoh*-201 and *MAGOHB*-201 with *Magohb*-201, followed by  
177 comparison of the alternate isoforms of *MAGOHB*, *MAGOHB*-204 with *Magohb*-205.

178 The principal isoforms of *MAGOH* in humans and mice are 100 % identical (Figure-2a), whereas in  
179 the case of *MAGOHB* the identity is 98%, owing to three different residues, i.e., amino acids 2-4  
180 (Figure-2b). Conservation of the primary isoforms is evident due to their suggested roles in EJC and  
181 NMD<sup>11,19</sup>. Proceeding to the alternate protein isoforms, as discussed above, the alternate protein of  
182 *MAGOH* (*MAGOH*-201, 109 aa) does not have any ortholog in mice, meaning this isoform is either  
183 not important or might be specifically generated in higher vertebrates including humans. Interestingly,  
184 the 102 aa *MAGOHB* proteins in humans and mice are 100% identical to each other (Figure-2c). The  
185 striking identity prompted us to analyze other species for the presence of alternate isoforms of  
186 *MAGOH*-paralogs. Thus, we analyzed the alternate isoforms in different species and performed a

187 multiple sequence alignment of the protein sequence. Quite interestingly, the alternate isoforms of the  
188 MAGOH-paralogs are conserved across vertebrates (Table 3). Though the alternate isoform of  
189 MAGOH, 109 aa is not present in mice, it is present in 52 other species, where the protein sequence  
190 differs only at position 2 (Supplementary Figure-1 and 2). The alternate isoform of MAGOHB, 102  
191 aa, is present in 11 different species and is 100% identical in 10 species, but differs in the alternate  
192 isoform of kangaroo rat- *Dipodomys ordii* at position 25 and 35. We have also validated the  
193 expression of the conserved alternate protein-coding transcripts, *MAGOH-201* and *MAGOHB-204* in  
194 HEK-293 cells via RT-PCR (Figure-3a). We further performed a phylogenetic analysis of cDNA  
195 sequence from four species having alternate isoforms for both MAGOH and MAGOHB (highlighted  
196 in Table 3). The tree estimated via maximum likelihood shows the isoforms clustered into two groups,  
197 specific for MAGOH and MAGOHB. This indicates that similar to the principal isoforms, the  
198 alternate isoforms are also evolutionarily conserved orthologs (Figure-3b). The conservation of the  
199 alternate protein isoforms of MAGOH paralogs across species is quite riveting. Consequently, an  
200 evolutionary pressure must have resulted in conservation of the alternate protein isoforms of both the  
201 MAGOH-paralogs. It has been previously pointed that an identity in the range of 50%-70% is the  
202 defining boundary of protein conservation, and function of conserved proteins is generally expected to  
203 be preserved above 70% identity<sup>20</sup>. Thus, the presence of a conserved alternate isoform of MAGOH  
204 and MAGOHB does not seem to be a mere coincidence and might involve a functional role, yet  
205 unexplored. Due to the difference in the residues of the principal and alternate isoforms of MAGOH  
206 paralogs, there might exist structural and functional differences between them which we have  
207 elaborated below.

208 The structure of MAGOH is composed of three  $\alpha$  helices and six  $\beta$  strands that form an extended  
209 sheet<sup>15</sup>. The helices form a hydrophobic core to interact with the RNA-binding domain of Y-14,  
210 which is primarily involved in protein-protein interactions. The extended  $\beta$  sheet contains conserved  
211 residues, forming the binding platform for EJC factors or other associated proteins<sup>15,19</sup>. On aligning  
212 the principal and alternate protein isoforms in humans, we found the alternate isoform of MAGOH to  
213 have 74.7% sequence identity to the principal MAGOH isoform, whereas the alternate MAGOHB



214 isoform has 68.9% sequence identity to the principal MAGOHB isoform (Figure-2d, 2e). Comparison  
215 of structural features is shown in Figure-4. As shown, the alternate isoform of MAGOH lacks residues  
216 50-86 corresponding to the principal MAGOH isoform, MAGOH-202. These residues constitute a  
217 portion of the  $\alpha_1$  helix of MAGOH. Helix  $\alpha_1$  with helix  $\alpha_3$  form a part of the hydrophobic core which  
218 binds the RNA-binding domain (RBD) of Y-14. Consequently, the alternate isoform, MAGOH-201,  
219 might lack the ability to bind Y-14 or may bind to it without masking Y-14's RBD. If the alternate  
220 isoform of MAGOH binds Y-14 it will be interesting to find out the stability and possible function of  
221 this alternate heterodimer complex.

222 The N-terminus of the principal MAGOH isoform contains conserved residues, Tyr6, Tyr10, and  
223 Phe21 of the  $\beta$ -sheet<sup>15</sup>. Since the alternate isoform of MAGOHB, MAGOHB-204, lacks residues 1-  
224 46, it also lacks these conserved residues present in the  $\beta$  sheet. Consequently, mutations in residues  
225 16/17, 20, 39/40, 41/42 of the principal MAGOH protein result in loss of interaction with pre-mRNA,  
226 spliced mRNA as well as EJC components, BTZ, UPF3b and eIF4A3, whereas interaction with Y-14  
227 and PYM remains intact<sup>21</sup>. Thus, MAGOHB-204 might have functional Y-14 binding but may lack  
228 binding with other EJC factors.

229 To summarize, we find that the generation of alternate protein isoforms by MAGOH-paralogs is not  
230 only limited to humans, but also extends to other species. The high degree of conservation of the  
231 alternate protein isoforms, MAGOH-201 (109 aa) and MAGOHB-204 (102 aa), may point out to the  
232 presence of an evolutionary pressure maintaining multiple isoforms of MAGOH and MAGOHB.  
233 These alternate protein isoforms might be involved in regulating the levels of principal MAGOH  
234 proteins or may have functions entirely different from the principal isoforms.

235 Delineating the function of these isoforms is challenging because of the sequence similarity between  
236 the primary and alternate protein isoforms. Hence, the function of the alternate isoforms might need to  
237 be analysed in conditions where the principal isoform is absent, and is the subject of further  
238 experimentations.

### 239 3. MATERIALS AND METHODS

### 240 3.1 Sequence information for isoforms

241 All the sequence information for *Homo sapiens* and *Mus musculus* were taken from Ensembl (Release  
242 101) (<https://asia.ensembl.org/index.html>)<sup>22</sup>. The Ensembl IDs are - ENSG00000162385(MAGOH),  
243 ENSG00000111196(MAGOHB) for human MAGOH paralogs, and  
244 ENSMUSG00000028609(Magoh), ENSMUSG00000030188(Magohb) for Magoh paralogs in mice.  
245 Genome assembly versions referred were Human-GRCh38.p13 and Mouse-GRCm38.p6.

### 246 3.2 Sequence alignment

247 Alignments were generated using the CLC Main Workbench's alignment tool and the identity among  
248 aligned proteins was analysed using the EMBOSS Needle pairwise alignment tool<sup>23</sup>. The proteins  
249 were aligned with the BLOSUM62 matrix. Gap opening penalty was kept at 10 and gap extension  
250 penalty at 0.5. Multiple sequence alignments of the alternate isoforms (109 aa and 102 aa) were  
251 performed using ClustalW in the MEGA-X<sup>24</sup> tool with the following parameters- gap opening penalty  
252 10.00, gap extension penalty 0.20. Jalview was used for visualisation of the multiple sequence  
253 alignments<sup>25</sup>. Phylogenetic trees were generated using MEGA-X as previously described<sup>26</sup>, briefly the  
254 cDNA sequence was downloaded from Ensembl, codons aligned using MUSCLE followed by model  
255 generation and using the highest model to estimate the phylogenetic tree via maximum likelihood.

### 256 3.3 Isoform expression analysis

257 RNA for isoform analysis was extracted from HEK-293 cells, cultured in DMEM at 37°C in a  
258 humidified CO<sub>2</sub> incubator. The RNA was converted into cDNA using the Super Reverse Transcriptase  
259 MuLV cDNA kit (Biobharati). The primers sequence for the principal isoform were used as described  
260 previously<sup>11</sup>. Primer sequences for the alternate isoforms are mentioned in the supplementary file.

### 261 ACKNOWLEDGEMENT

262 We would like to thank all the members of the KKS lab for their helpful suggestions, especially  
263 Bhagyashree Deka for her insightful comments on the manuscript. A.R. and P.C. are funded under  
264 the scholarships provided by Ministry of Human Resource Development (MHRD), Govt. of India.  
265 K.K.S. acknowledges funding from the Science & Engineering Research Board (SERB), Government

266 of India [Grant No. CRG/2019/001352]. We would also like to thank the Indian Institute of  
267 Technology, Guwahati for providing required resources.

## 268 **CONFLICTS OF INTEREST**

269 The authors declare no competing conflicts.

270

## 271 **REFERENCES**

- 272 1. Singh G, Kucukural A, Cenik C, Leszyk JD, Shaffer SA, Weng Z, Moore MJ. The cellular EJC  
273 interactome reveals higher-order mRNP structure and an EJC-SR protein nexus. *Cell* **151**, 750–  
274 764 (2012). doi: 10.1016/j.cell.2012.10.007
- 275 2. Tange TØ, Shibuya T, Jurica MS, Moore MJ. Biochemical analysis of the EJC reveals two new  
276 factors and a stable tetrameric protein core. *RNA* **11**, 1869–1883 (2005). doi:  
277 10.1261/rna.2155905.
- 278 3. Kataoka N, Diem MD, Kim VN, Yong J, Dreyfuss G. Magoh, a human homolog of *Drosophila*  
279 *mago nashi* protein, is a component of the splicing-dependent exon-exon junction complex.  
280 *EMBO J.* **20**, 6424-33 (2001). doi: 10.1093/emboj/20.22.6424.
- 281 4. Wang Z, Ballut L, Barbosa I, Le Hir H. Exon Junction Complexes can have distinct functional  
282 flavours to regulate specific splicing events. *Sci Rep.* **8**, 9509 (2018). doi: 10.1038/s41598-018-  
283 27826-y.
- 284 5. Le Hir H, Izaurralde E, Maquat LE, Moore MJ. The spliceosome deposits multiple proteins 20-24  
285 nucleotides upstream of mRNA exon-exon junctions. *EMBO J.* **19**, 6860-9 (2000). doi:  
286 10.1093/emboj/19.24.6860.
- 287 6. Le Hir H, Gatfield D, Braun IC, Forler D, Izaurralde E. The protein Mago provides a link between  
288 splicing and mRNA localization. *EMBO Rep.* **2**, 1119-24 (2001). doi: 10.1093/embo-  
289 reports/kve245.
- 290 7. McMahon JJ, Miller EE, Silver DL. The exon junction complex in neural development and  
291 neurodevelopmental disease. *Int J Dev Neurosci.* **55**, 117-123 (2016). doi:  
292 10.1016/j.ijdevneu.2016.03.006. Epub 2016 Apr 9. PMID: 27071691.
- 293 8. Boswell RE, Prout ME, Steichen JC. Mutations in a newly identified *Drosophila melanogaster*  
294 gene, *mago nashi*, disrupt germ cell formation and result in the formation of mirror-image  
295 symmetrical double abdomen embryos. *Development.* **113**, 373-84 (1991). Erratum in:  
296 *Development* 1991 Dec;113(4):precedi. PMID: 1765008.
- 297 9. Gehring NH, Kunz JB, Neu-Yilik G, Breit S, Viegas MH, Hentze MW, Kulozik AE. Exon-  
298 junction complex components specify distinct routes of nonsense-mediated mRNA decay with

- 299 differential cofactor requirements. *Molecular cell*. **20**, 65-75 (2005). doi:  
300 10.1016/j.molcel.2005.08.012. PMID: 16209946.
- 301 10. Gangras P, Gallagher TL, Parthun MA, Yi Z, Patton RD, Tietz KT, Deans NC, Bundschuh R,  
302 Amacher SL, Singh G. Zebrafish *rbm8a* and *magoh* mutants reveal EJC developmental functions  
303 and new 3'UTR intron-containing NMD targets. *PLoS genetics*. **16**, e1008830 (2020). doi:  
304 10.1371/journal.pgen.1008830. PMID: 32502192; PMCID: PMC7310861.
- 305 11. Singh KK, Wachsmuth L, Kulozik AE, Gehring NH. Two mammalian MAGOH genes contribute  
306 to exon junction complex composition and nonsense-mediated decay. *RNA Biology* **10**, 1291–  
307 1298 (2013).
- 308 12. Viswanathan SR, Nogueira MF, Buss CG, Krill-Burger JM, Wawer MJ, Malolepsza E, Berger  
309 AC, Choi PS, Shih J, Taylor AM, Tanenbaum B, Pedamallu CS, Cherniack AD, Tamayo P,  
310 Strathdee CA, Lage K, Carr SA, Schenone M, Bhatia SN, Vazquez F, Tsherniak A, Hahn WC,  
311 Meyerson M. Genome-scale analysis identifies paralog lethality as a vulnerability of chromosome  
312 1p loss in cancer. *Nature Genetics* **50**, 937-943 (2018). doi: 10.1038/s41588-018-0155-3. PMID:  
313 29955178; PMCID: PMC6143899.
- 314 13. Zhou Y, Li Z, Wu X, Tou L, Zheng J, Zhou D. MAGOH/MAGOHB Inhibits the Tumorigenesis  
315 of Gastric Cancer via Inactivation of b-RAF/MEK/ERK Signaling. *OncoTargets and therapy* **13**,  
316 12723-12735 (2020). doi: 10.2147/OTT.S263913. PMID: 33328743; PMCID: PMC7735944.
- 317 14. Zhao XF, Colaizzo-Anas T, Nowak NJ, Shows TB, Elliott RW, Aplan PD. The mammalian  
318 homologue of *mago nashi* encodes a serum-inducible protein. *Genomics*. **47**, 319-22 (1998). doi:  
319 10.1006/geno.1997.5126.
- 320 15. Lau CK, Diem MD, Dreyfuss G, Van Duyne GD. Structure of the Y14-Magoh core of the exon  
321 junction complex. *Curr Biol*. **13**, 933-41 (2003). doi: 10.1016/s0960-9822(03)00328-2.
- 322 16. McGlincy NJ, Smith CW. Alternative splicing resulting in nonsense-mediated mRNA decay:  
323 what is the meaning of nonsense? *Trends Biochem Sci.***33**, 385-93 (2008). doi:  
324 10.1016/j.tibs.2008.06.001.
- 325 17. Jacob AG, Smith CWJ. Intron retention as a component of regulated gene expression programs.  
326 *Hum Genet*. **136**, 1043-1057 (2017). doi: 10.1007/s00439-017-1791-x.
- 327 18. Zambelli F, Pavesi G, Gissi C, Horner DS, Pesole G. Assessment of orthologous splicing  
328 isoforms in human and mouse orthologous genes. *BMC Genomics*. **11**, 534 (2010). doi:  
329 10.1186/1471-2164-11-534.
- 330 19. Fribourg S, Gatfield D, Izaurralde E, Conti E. A novel mode of RBD-protein recognition in the  
331 Y14-Mago complex. *Nat Struct Biol*. **10**, 433-9 (2003). doi: 10.1038/nsb926.
- 332 20. Morata J, Béjar S, Talavera D, Riera C, Lois S, de Xaxars GM, de la Cruz X. The relationship  
333 between gene isoform multiplicity, number of exons and protein divergence. *PLoS One*. **8**,  
334 e72742 (2013). doi: 10.1371/journal.pone.0072742.

- 335 21. Gehring NH, Lamprinaki S, Hentze MW, Kulozik AE. The hierarchy of exon-junction complex  
336 assembly by the spliceosome explains key features of mammalian nonsense-mediated mRNA  
337 decay. *PLoS Biol.* **7** e1000120 (2009). doi: 10.1371/journal.pbio.1000120.
- 338 22. Yates AD, Achuthan P, Akanni W, Allen J, Allen J, Alvarez-Jarreta J, Amode MR, Armean IM,  
339 Azov AG, Bennett R, Bhai J, Billis K, Boddu S, Marugán JC, Cummins C, Davidson C, Dodiya  
340 K, Fatima R, Gall A, Giron CG, Gil L, Grego T, Haggerty L, Haskell E, Hourlier T, Izuogu OG,  
341 Janacek SH, Juettemann T, Kay M, Lavidas I, Le T, Lemos D, Martinez JG, Maurel T, McDowall  
342 M, McMahon A, Mohanan S, Moore B, Nuhn M, Oheh DN, Parker A, Parton A, Patricio M,  
343 Sakthivel MP, Abdul Salam AI, Schmitt BM, Schuilenburg H, Sheppard D, Sycheva M, Szuba M,  
344 Taylor K, Thormann A, Threadgold G, Vullo A, Walts B, Winterbottom A, Zadissa A,  
345 Chakiachvili M, Flint B, Frankish A, Hunt SE, Iisley G, Kostadima M, Langridge N, Loveland  
346 JE, Martin FJ, Morales J, Mudge JM, Muffato M, Perry E, Ruffier M, Trevanion SJ, Cunningham  
347 F, Howe KL, Zerbino DR, Flicek P. Ensembl 2020. *Nucleic Acids Res.* **48**, D682-D688 (2020).  
348 doi: 10.1093/nar/gkz966.
- 349 23. Madeira F, Park YM, Lee J, Buso N, Gur T, Madhusoodanan N, Basutkar P, Tivey ARN, Potter  
350 SC, Finn RD, Lopez R. The EMBL-EBI search and sequence analysis tools APIs in 2019. *Nucleic  
351 Acids Res.* **47**, W636-W641 (2019). doi: 10.1093/nar/gkz268.
- 352 24. Kumar S, Stecher G, Li M, Knyaz C, Tamura K. MEGA X: Molecular Evolutionary Genetics  
353 Analysis across Computing Platforms. *Mol Biol Evol.* **35**, 1547-1549 (2018). doi:  
354 10.1093/molbev/msy096.
- 355 25. Waterhouse AM, Procter JB, Martin DMA, Clamp M, Barton GJ. Jalview Version 2 - a multiple  
356 sequence alignment editor and analysis workbench. *Bioinformatics* **25**, 1189-1191(2009).doi:  
357 10.1093/bioinformatics/btp033s
- 358 26. Barry G Hall. Building Phylogenetic Trees from Molecular Data with MEGA. *Molecular Biology  
359 and Evolution* **30**, 1229–1235 (2013). doi: 10.1093/molbev/mst012.

360

361

362

363

364

365

366

367

368

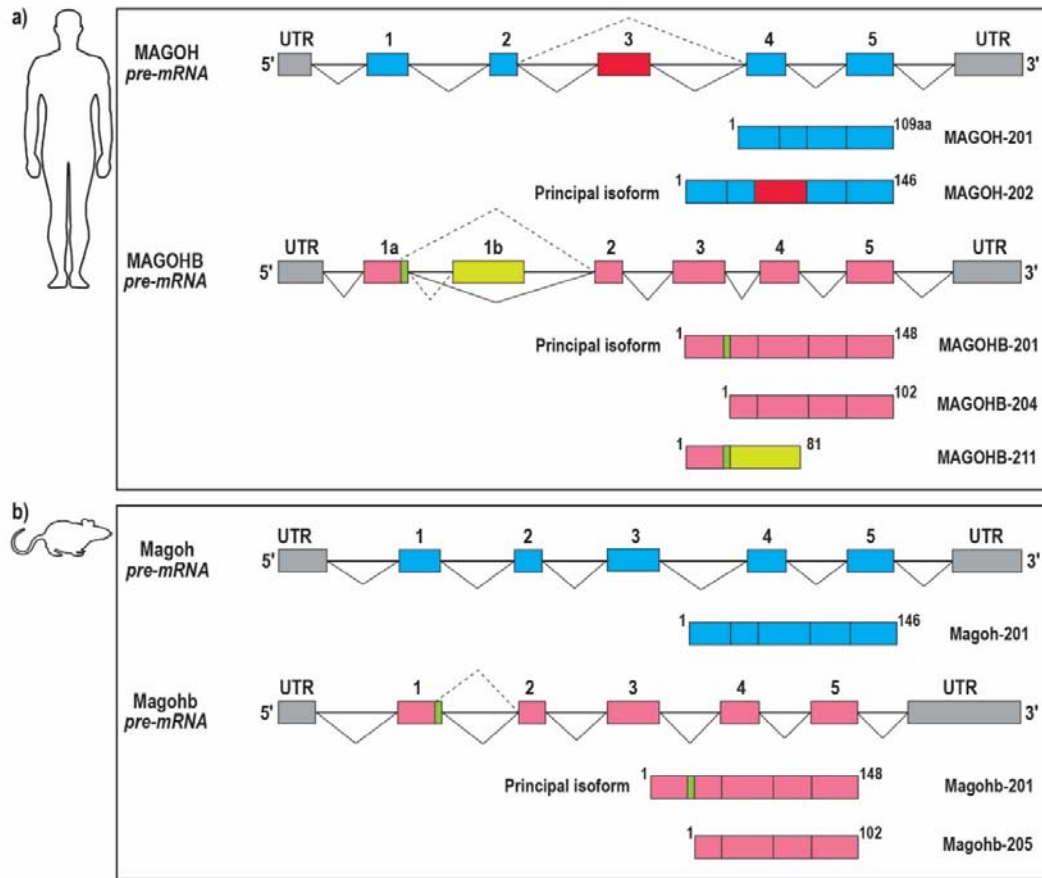

369

370 **Figure 1- Isoforms of MAGOH-paralogs** in (a) humans and (b) mice. The pre-mRNA generated  
371 from each gene is shown on top, where boxes represent exons, and introns are represented by  
372 horizontal lines. Constitutive splicing is denoted with solid lines, while alternative splicing is denoted  
373 with dashed lines. MAGOH is represented in blue and MAGOHB is represented in pink. The pre-  
374 mRNA shown here includes exons of the protein-coding transcripts. Principal and alternate protein  
375 isoforms are shown below each pre-mRNA, where each box represents coding exons from the pre-  
376 mRNA.

377

378

379

380

381

382

383

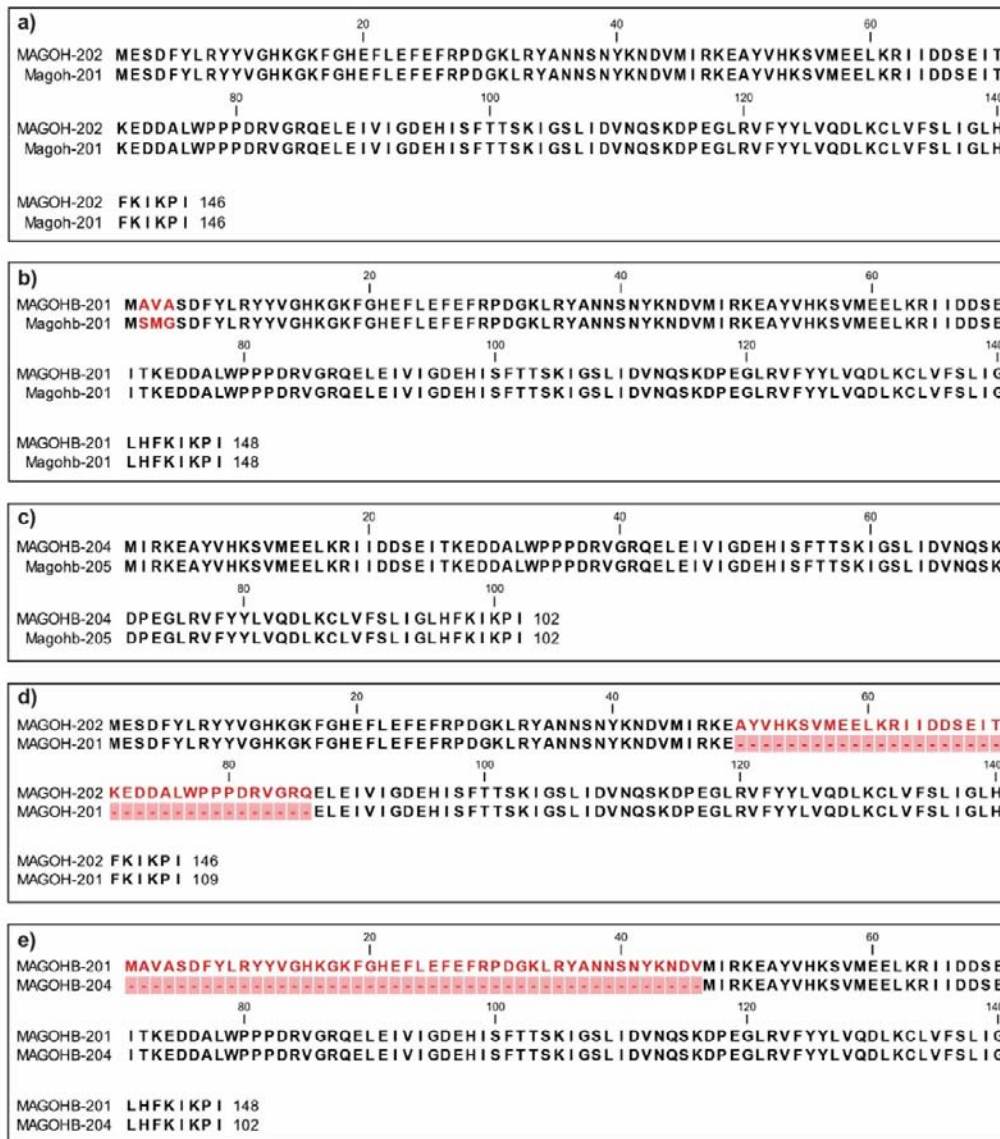

384

385 **Figure 2- Pairwise alignment of MAGOH protein isoforms.** The protein isoform alignments were  
 386 generated using the CLC Main Workbench. **a)** MAGOH principal isoform alignment in humans  
 387 (MAGOH-202) and mice (Magoh-201) **b)** MAGOHB principal isoform alignment in humans  
 388 (MAGOHB-201) and mice (Magohb-201) **c)** MAGOHB alternate isoform alignment in humans  
 389 (MAGOHB-204) and mice (Magohb-205). The principal and alternate isoforms of  
 390 MAGOH/MAGOHB in humans were also aligned to each other to analyse similarity - **d)** MAGOH  
 391 principal isoform (MAGOH-202) aligned with alternate isoform (MAGOH-201) **e)** MAGOHB  
 392 principal isoform (MAGOHB-201) aligned with its alternate isoform (MAGOHB-204). The different  
 393 residues are coloured in red, gaps are coloured in pink boxes and represented as dashes.

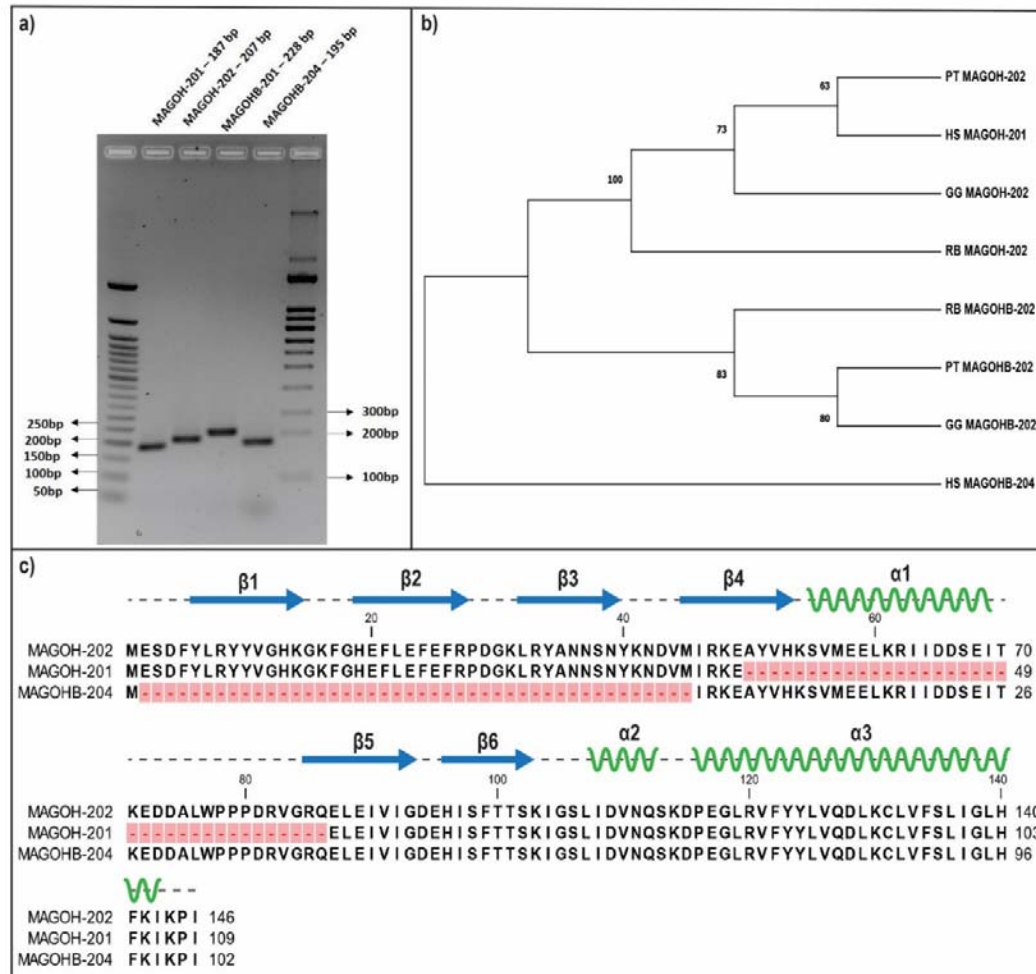

394

395 **Figure-3 Analysis of alternate isoforms of MAGOH paralogs.** a) The expression of alternate  
 396 isoforms was validated in HEK-293 cells. The expected size of amplicons is mentioned in brackets. b)  
 397 Phylogenetic tree for species expressing both the isoforms of MAGOH paralogs. The numbers on  
 398 each node indicate bootstrap values for 500 replicates. PT- *Pan troglodytes*, HS- *Homo sapiens*, GG-  
 399 *Gorilla gorilla*, RB- *Rhinopithecus bieti*. c) Structural comparison of alternate isoforms to the  
 400 principal MAGOH isoform, MAGOH-202. MAGOH-202 is aligned with MAGOH-201 (109 amino  
 401 acids, devoid of residues 50-86) and MAGOHB-204 (102 amino acids, lacking N-terminus residues 1-  
 402 46). The gaps are represented in pink boxes. Secondary structures are represented above the alignment  
 403 according to the crystal structure of MAGOH-Y14 (PDB ID 1P27), described by Lau et al<sup>15</sup>. Here, β1-  
 404 6 represent β strands and α1-3 represent α-helices.

405

406



407 **Table 1- MAGOH paralog isoforms in *Homo sapiens***

| Transcript ID     | Ensembl ID        | Length (bases) | Protein (amino acids) | Biotype                       | 5'UTR (bases) | Exon 1 (bases)  | Exon 2 (bases)          | Exon3 (bases) | Exon4 (bases)    | Exon5 (bases)     | Exon6 (bases) | 3' UTR (bases) |
|-------------------|-------------------|----------------|-----------------------|-------------------------------|---------------|-----------------|-------------------------|---------------|------------------|-------------------|---------------|----------------|
| <b>MAGOH-201</b>  | ENST00000371466.4 | 500            | 109                   | Protein-coding                | 51            | <b>51*</b> + 88 | 59                      | 83            | 100 + <b>119</b> | -                 | -             | 119            |
| <b>MAGOH-202</b>  | ENST00000371470.8 | 656            | 146                   | Protein-coding                | 70            | <b>70</b> + 88  | 59                      | 111           | 83               | 100 + <b>145</b>  | -             | 145            |
| MAGOH-203         | ENST00000462941.1 | 738            | -                     | Processed transcript (no ORF) | -             | 148             | 59                      | 531           | -                | -                 | -             | -              |
| MAGOH-204         | ENST00000495868.1 | 695            | -                     | Processed transcript          | -             | 398             | 83                      | 214           | -                | -                 | -             | -              |
| <b>MAGOHB-201</b> | ENST00000320756.7 | 2606           | 148                   | Protein-coding                | 77            | <b>77</b> + 94  | 59                      | 111           | 83               | 100 + <b>2082</b> | -             | 2082           |
| MAGOHB-202        | ENST00000398874.8 | 549            | -                     | IR*                           | -             | 187             | 362                     | -             | -                | -                 | -             | -              |
| MAGOHB-203        | ENST00000537852.5 | 2671           | -                     | IR                            | -             | 162             | 59                      | 2088          | -                | -                 | -             | -              |
| <b>MAGOHB-204</b> | ENST00000539554.5 | 666            | 102                   | Protein-coding                | 95            | <b>51</b>       | <b>44</b> + 15          | 111           | 83               | 100 + <b>262</b>  | -             | 262            |
| MAGOHB-205        | ENST00000540074.5 | 705            | 44                    | NMD*                          | 95            | <b>51</b>       | <b>45</b> + 15          | 111           | 9 + <b>277</b>   | <b>83</b>         | <b>115</b>    | 475            |
| MAGOHB-206        | ENST00000543929.5 | 841            | 81                    | NMD                           | 68            | <b>68</b> + 94  | <b>152</b> + <b>187</b> | <b>59</b>     | <b>111</b>       | <b>170</b>        | -             | 527            |
| MAGOHB-207        | ENST00000544176.1 | 559            | -                     | IR                            | -             | 162             | 59                      | 338           | -                | -                 | -             | -              |
| MAGOHB-208        | ENST00000544850.5 | 1057           | 90                    | NMD                           | 62            | <b>62</b> + 94  | 59                      | 111           | 9 + <b>277</b>   | <b>83</b>         | <b>362</b>    | 722            |
| MAGOHB-209        | ENST00000545236.5 | 868            | 81                    | NMD                           | 77            | <b>77</b> + 94  | <b>152</b> + <b>187</b> | <b>59</b>     | <b>111</b>       | <b>83</b>         | <b>105</b>    | 545            |
| MAGOHB-210        | ENST00000546173.5 | 576            | 81                    | NMD                           | 41            | <b>41</b> + 94  | <b>152</b> + <b>12</b>  | <b>59</b>     | <b>111</b>       | <b>107</b>        | -             | 289            |
| MAGOHB-211        | ENST00000625272.1 | 319            | 81                    | Protein-coding                | 73            | <b>73</b> + 94  | 152                     | -             | -                | -                 | -             | -              |

408 \*NMD = Nonsense-mediated mRNA decay, IR= Intron retention, \* Number of bases written in red correspond to untranslated regions (UTR)

| Transcript ID     | Ensembl ID            | Length (bases) | Protein (amino acids) | Biotype              | 5' UTR (bases) | Exon 1 (bases) | Exon 2 (bases) | Exon3 (bases) | Exon4 (bases) | Exon5 (bases) | Exon6 (bases) | 3' UTR (bases) |
|-------------------|-----------------------|----------------|-----------------------|----------------------|----------------|----------------|----------------|---------------|---------------|---------------|---------------|----------------|
| <b>Magoh-201</b>  | ENSMUST00000030348.5  | 692            | 146                   | Protein coding       | 103            | 103* + 88      | 59             | 111           | 83            | 100 + 148     | -             | 148            |
| Magoh-202         | ENSMUST00000141376.1  | 483            | -                     | Processed transcript | -              | 189            | 83             | 211           | -             | -             | -             | -              |
| <b>Magohb-201</b> | ENSMUST00000032307.11 | 767            | 148                   | Protein coding       | 79             | 79 + 94        | 59             | 111           | 83            | 100 + 241     | -             | 241            |
| Magohb-202        | ENSMUST00000172883.7  | 460            | 35                    | NMD*                 | -              | 60             | 47 + 64        | 83            | 206           | -             | -             | 353            |
| Magohb-203        | ENSMUST00000173198.7  | 561            | 44                    | NMD                  | -              | 80             | 53 + 147       | 59            | 111           | 83            | 28            | 428            |
| <b>Magohb-204</b> | ENSMUST00000173332.1  | 395            | 44                    | NMD                  | -              | 80             | 54 + 147       | 59            | 56            | -             | -             | 262            |
| Magohb-205        | ENSMUST00000173837.5  | 897            | 102                   | Protein coding       | 564            | 520            | 44 + 15        | 111           | 83            | 100 + 24      | -             | 24             |
| Magohb-206        | ENSMUST00000174488.1  | 447            | -                     | IR*                  | -              | 231            | 216            | -             | -             | -             | -             | -              |
| Magohb-207        | ENSMUST00000174781.3  | 546            | -                     | IR                   | -              | 288            | 111            | 83            | 64            | -             | -             | -              |

410 **Table 2- Magoh paralogs in *Mus musculus***

411 \*NMD = Nonsense-mediated mRNA decay, IR= Intron retention, \* Number of bases written in red correspond to untranslated regions (UTR)

412

413 **Table 3- Species with conserved alternate isoforms of MAGOH paralogs**

| Gene  | Size of protein (amino acids) | Species with conserved isoform                                                                                                                                                                                                                                                                                                                                                                                                                                                                                                                                                                                                                                                                                                                                                                                                                                                                                                                                                                                                                                                                                                                                                                                                                                                                                                                                                                                                                                                                                                                                                                                            |
|-------|-------------------------------|---------------------------------------------------------------------------------------------------------------------------------------------------------------------------------------------------------------------------------------------------------------------------------------------------------------------------------------------------------------------------------------------------------------------------------------------------------------------------------------------------------------------------------------------------------------------------------------------------------------------------------------------------------------------------------------------------------------------------------------------------------------------------------------------------------------------------------------------------------------------------------------------------------------------------------------------------------------------------------------------------------------------------------------------------------------------------------------------------------------------------------------------------------------------------------------------------------------------------------------------------------------------------------------------------------------------------------------------------------------------------------------------------------------------------------------------------------------------------------------------------------------------------------------------------------------------------------------------------------------------------|
| MAGOH | 109                           | <i>Anser brachyrhynchus</i> , <i>Anser cygnoides</i> , <i>Aotus nancymae</i> , <i>Bison bison bison</i> , <i>Bos grunniens</i> , Hybrid - <i>Bos Indicus (Bos indicus x Bos taurus)</i> , <i>Bos mutus</i> , Hybrid - <i>Bos Taurus (Bos indicus x Bos taurus)</i> , <i>Callithrix jacchus</i> , <i>Camelus dromedarius</i> , <i>Canis lupus familiaris</i> , <i>Canis lupus familiaris</i> , <i>Carlito syricta</i> , <i>Catagonus wagneri</i> , <i>Cebus capucinus imitator</i> , <i>Cercocebus atys</i> , <i>Colobus angolensis palliatus</i> , <i>Equus caballus</i> , <i>Felis catus</i> , <b><i>Gorilla gorilla gorilla</i></b> , <b><i>Homo sapiens</i></b> , <i>Lynx canadensis</i> , <i>Macaca fascicularis</i> , <i>Macaca nemestrina</i> , <i>Mandrillus leucophaeus</i> , <i>Microcebus murinus</i> , <i>Monodelphis domestica</i> , <i>Moschus moschiferus</i> , <i>Neovison vison</i> , <i>Nomascus leucogenys</i> , <i>Ornithorhynchus anatinus</i> , <i>Oryctolagus cuniculus</i> , <i>Bonobo</i> , <i>Pan paniscus</i> , <b><i>Pan troglodytes</i></b> , <i>Panthera leo</i> , <i>Panthera pardus</i> , <i>Panthera tigris altaica</i> , <i>Papio anubis</i> , <i>Physeter catodon</i> , <i>Ptilocolobus tephrosceles</i> , <i>Podarcis muralis</i> , <i>Prolemur simus</i> , <i>Propithecus coquereli</i> , <i>Rhinolophus ferrumequinum</i> , <b><i>Rhinopithecus bieti</i></b> , <i>Rhinopithecus roxellana</i> , <i>Saimiri boliviensis boliviensis</i> , <i>Suricata suricatta</i> , <i>Sus scrofa</i> , <i>Theropithecus gelada</i> , <i>Ursus thibetanus thibetanus</i> , <i>Vombatus ursinus</i> |

|        |     |                                                                                                                                                                                                                                                                                                                 |
|--------|-----|-----------------------------------------------------------------------------------------------------------------------------------------------------------------------------------------------------------------------------------------------------------------------------------------------------------------|
| MAGOHB | 102 | <i>Cavia porcellus</i> , <i>Cricetulus griseus</i> , <i>Dipodomys ordii</i> , <b><i>Gorilla gorilla gorilla</i></b> , <b><i>Homo sapiens</i></b> , <i>Mus musculus</i> , <i>Mus pahari</i> , <i>Mus spretus</i> , <i>Nannospalax galili</i> , <b><i>Pan troglodytes</i></b> , <b><i>Rhinopithecus bieti</i></b> |
|--------|-----|-----------------------------------------------------------------------------------------------------------------------------------------------------------------------------------------------------------------------------------------------------------------------------------------------------------------|

414
